# Supplementary material for: Chemoenzymatic Synthesis of trans-β-Aryl-δ-hydroxy-γ-lactones and Enzymatic Kinetic Resolution of Their Racemic Mixtures
Source: MDPI journal article supplement (doi:10.3390/molecules21111552), 2016-11-23
Supplement: s1 [file s1]

# Supplementary Materials: Chemoenzymatic Synthesis of *trans*- $\beta$ -Aryl- $\delta$ -hydroxy- $\gamma$ -lactones and Enzymatic Kinetic Resolution of Their Racemic Mixtures

Andrzej Skrobiszewski, Witold Gładkowski, Gabriela Maciejewska and Czesław Wawrzęczyk

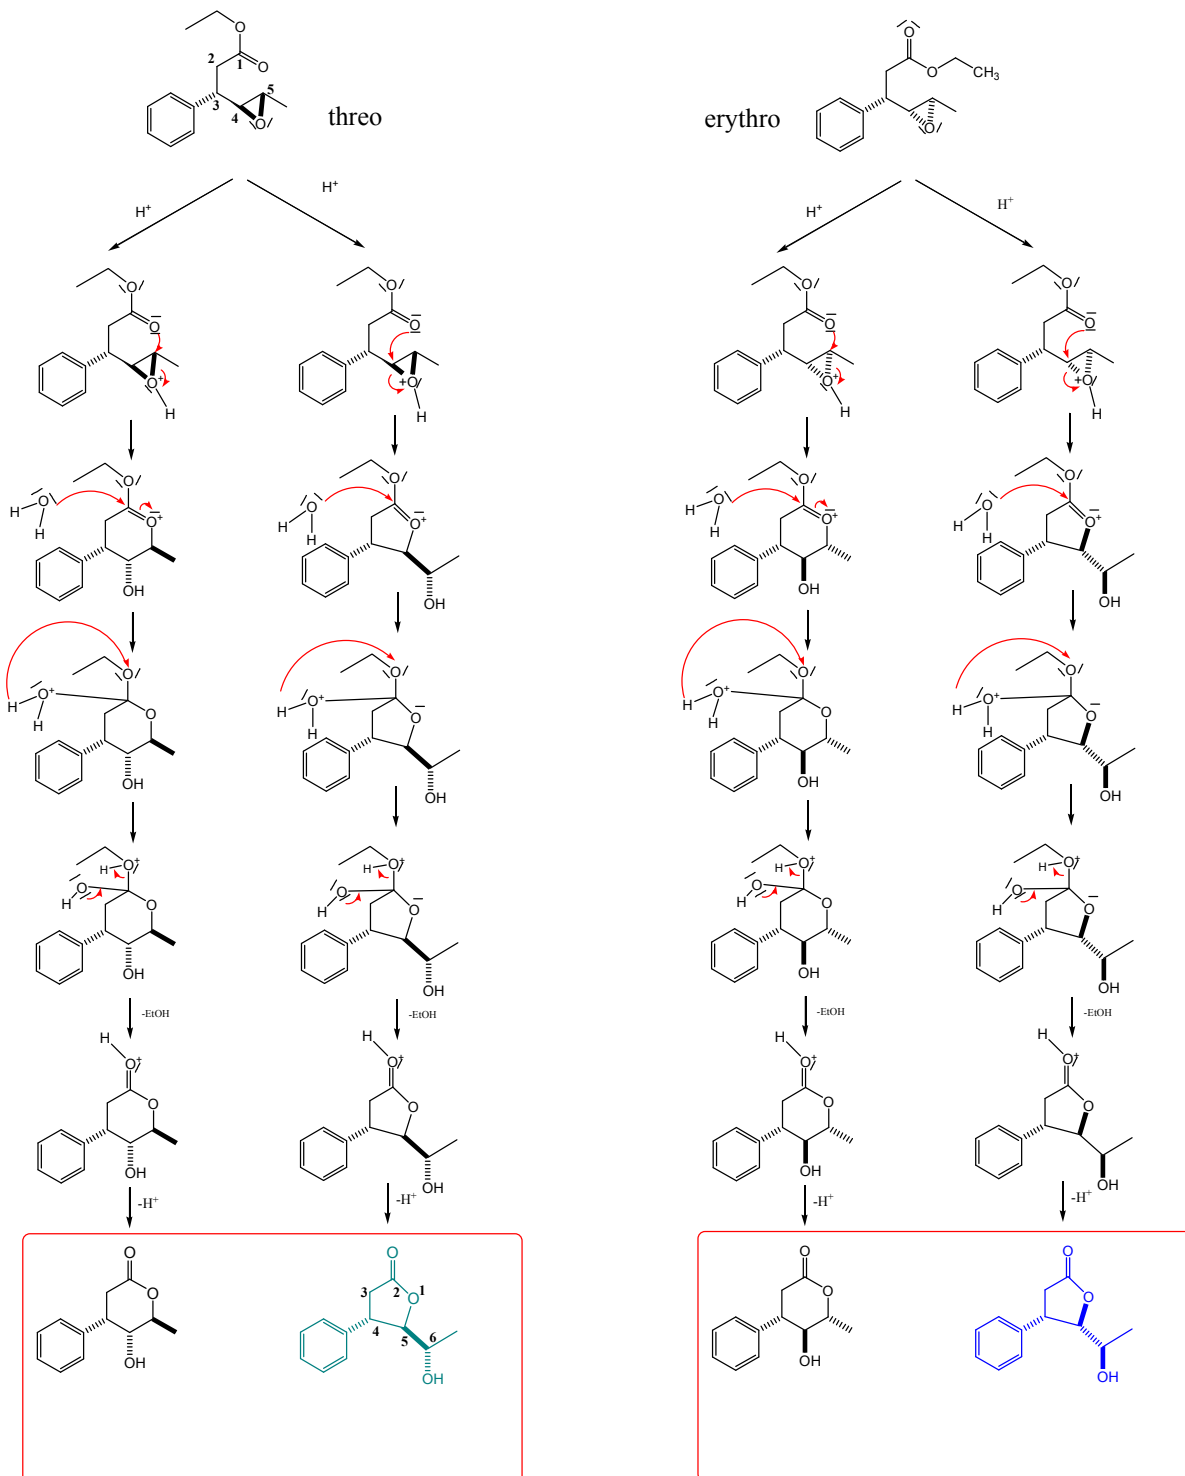

**Figure S1.** Formation of possible product of lactonization of *threo* and *erythro* isomers of epoxyesters.
